# Supplementary material for: PilY1 and minor pilins form a complex priming the type IVa pilus in Myxococcus xanthus
Source: PubMed Central journal article supplement (PMC7541494; doi:10.1038/s41467-020-18803-z), 2020-10-07
Supplement: 41467_2020_18803_MOESM1_ESM.pdf [file 41467_2020_18803_MOESM1_ESM.pdf]

# Supplementary Materials for

## **PilY1 and minor pilins form a complex priming the type IVa pilus in *Myxococcus xanthus***

Anke Treuner-Lange, Yi-Wei Chang, Timo Glatter, Marco Herfurth, Steffi Lindow, Georges  
Chreifi, Grant J. Jensen & Lotte Søgaard-Andersen\*

\*Correspondence to: [sogaard@mpi-marburg.mpg.de](mailto:sogaard@mpi-marburg.mpg.de)

### **This file in includes:**

1. Supplementary Figures 1-13
2. Supplementary Tables 1-2
3. Supplementary References

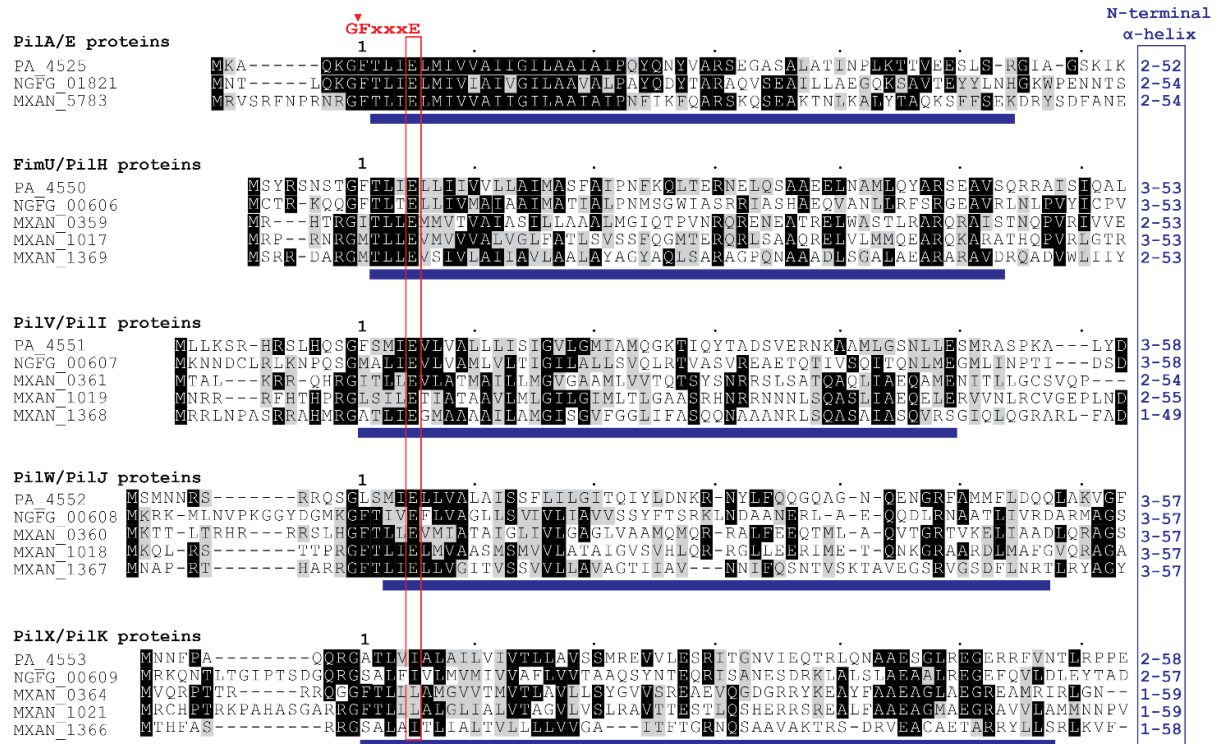

**Supplementary Figure 1. Major and minor pilins of *M. xanthus* have a the type III signal peptide and an N-terminal α-helix**

N-terminus of major and minor pilins of *M. xanthus*, *P. aeruginosa* and *N. gonorrhoeae* were aligned with T-Coffee using ClustalW output format. The type III signal peptide cleavage site (G↓FxxxE) is shown above in red and the Glu5 residue in the mature proteins is boxed. Note that PilX does not contain the Glu5 residue. The bars below the alignments indicate the predicted N-terminal α-helix for the *M. xanthus* proteins and numbers to the right of the alignment indicate the coordinates of the predicted N-terminal α-helix in the mature proteins. Note that the major pilin in *N. gonorrhoeae* is termed PilE, while minor pilins FimU3, PilV3, PilW3 and PilX3 are named PilH, PilI, PilJ and PilK respectively in *N. gonorrhoeae*.



**a** Domain architecture of PilY1 proteins of *M. xanthus*, *P. aeruginosa* (PA\_4554) and *N. gonorrhoeae* (Z50180, Z49120). The type I signal peptide (SP, red) was predicted using SignalP 4.1 and the conserved PilY1-domain (violet) and von Willebrand Factor A domain (vWFA, blue) were predicted using the PHYRE2 protein fold recognition tool. Numbers at the top left indicate the first residue after the predicted signal peptide cleavage site and numbers above domains represent domain coordinates. **b** Alignment of PilY1 domains of the indicated PilY1 proteins of *M. xanthus*, *P. aeruginosa* and *N. gonorrhoeae* generated with T-Coffee using ClustalW output format. **c** Homology models of conserved PilY1 domain of PilY1 proteins of *M. xanthus*. Rainbow colored structure of the PilY1-domain of PilY1 from *P. aeruginosa* (3HX6) [<https://www.rcsb.org/entry/3hx6>]<sup>1</sup> (N- to C-terminus, blue to red) together with the PHYRE2 homology models based on 3HX6 of the PilY1-domains of the three PilY1 proteins from *M. xanthus*. For each homology model, the confidence/identity level is given in %.

**a**

```

Caci_2163      59 RTKXXAKKRAATKVAIDDTTSCAF--FIVVAGTRG---ARM-----VYFTGCO---TIFA--LYQSRAAAKR-AMGRTHAN
PiiY1 (Pa)    198 RTRKATATPQTANLAFYSTPENARVSWOLNDSNC---NCM-----GSSESSGNCFSNYLRDFTGQHRVN--FFN-WTFKESVN
PiiY1.3 (Mx)  219 SFRGHSV----NVISQVVKPSLRTRGCVVTFSSASSEATDTAKWSGQDVVRFERFCPSGCDSLSCAKRQ---DINNN--LLSKMRNCRFN

Caci_2163     123 GCTAXCRWLAQAQRIDTA-----PSAIKIAALLTDCKDESETPAHLHARATCSISIGNF----
PiiY1 (Pa)    270 GCTPTTQAMTRAGEFLKKTGVNGEYAYRPT-----QTPEYSCRGSYHLLMTDGLWNN-DSANVC-NADSTARNLPDG-
PiiY1.3 (Mx)  301 TCTPTTQAMWGASTYFRSAGSD--FPDWFSSDYLRDSGFNDEAAPGRAATCTTCGFNAMILLTDGPPNR-PGSDSA-CVPAQVRNLDVPC

Caci_2163     176 ---MDC-----RGTGQDWRPKELRK-IADATLGVVCI-----
PiiY1 (Pa)    342 --KSYSSCTPYRDCDFDTLADQAFHYATDARFDIDDNIKPYIPYDQANPSADYWNERNPATWCHMVVYILCCLLTLTSPRWEGST
PiiY1.3 (Mx)  388 SNCAASCCSNSSCSIIIRIAKWMNTNLRRELSC-----SCAVATYTVCFALINTQAINLLRVTA

Caci_2163     206 -----PRASNNDSDNNVYDLWIIAAVNSRQVNSADSDDQVAATFOIILNRISGKDLPASRPAT 235
PiiY1 (Pa)    430 FSCYNDIVAGNLSWPRASNNDSDNNVYDLWIIAAVNSRQVNSADSDDQVAATFOIILNRISGKDLPASRPAT 501
PiiY1.3 (Mx)  451 DAC-----GRVYAAITNSSQLKLAALVDDVQNR-----N 481

```

**b**

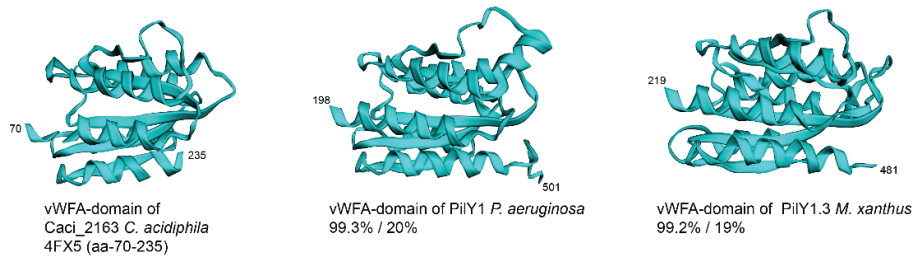

### Supplementary Figure 3. Analysis of von Willebrand Factor A (vWFA) domain in PiiY1.3

**a** Alignment of vWFA domains from the indicated proteins. The vWFA domains from the indicated proteins of *Catenulispora acidiphila*, *M. xanthus*, and *P. aeruginosa* were aligned with T-Coffee using ClustalW output format. **b** Homology model of vWFA domains of PiiY1.3 of *M. xanthus* and PiiY1 from *P. aeruginosa*. PHYRE2 homology models of vWFA domains of PiiY1.3 of *M. xanthus* and PiiY1 from *P. aeruginosa* were generated based on the vWFA domains of the *C. acidiphila* protein Caci\_2163 (4FX5) [[https://www.wwpdb.org/pdb?id=pdb\\_00004fx5](https://www.wwpdb.org/pdb?id=pdb_00004fx5)]. For each homology model, the confidence/identity level is given in %.

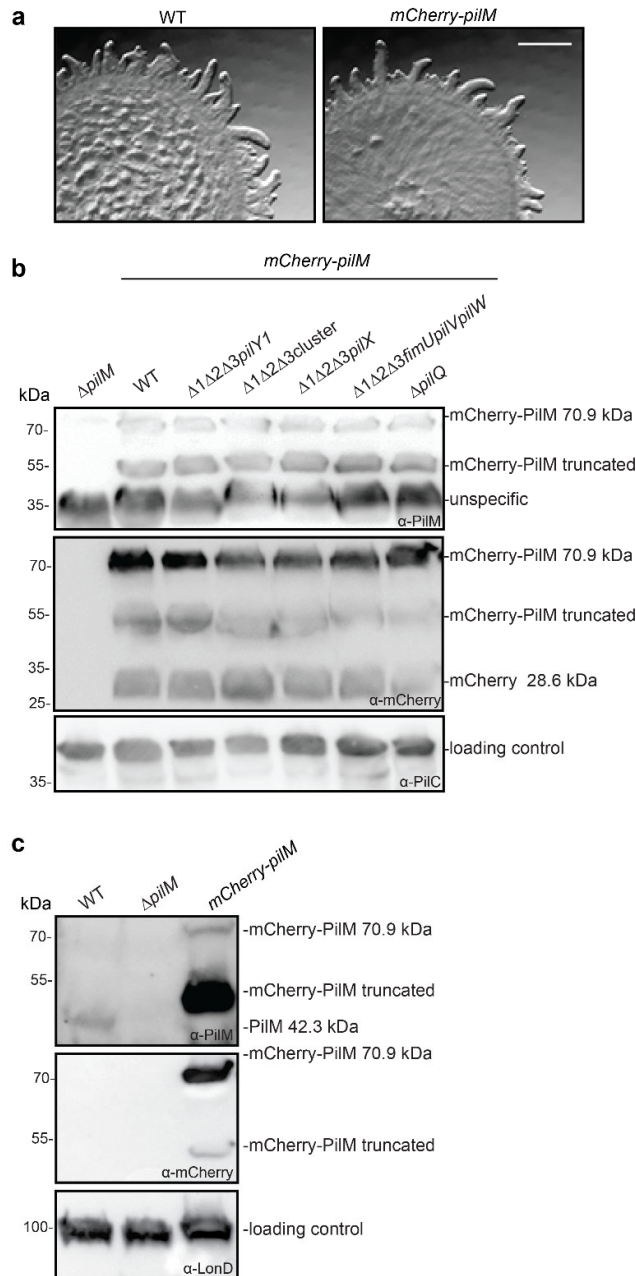

#### Supplementary Figure 4. The mCherry-PilM fusion is functional

**a** The mCherry-PilM fusion is functional. The indicated *M. xanthus* strains were incubated at for 24 h. Scale bar, 1 mm. In the *mCherry-pilM* strain, the native *pilM* gene was replaced by *mCherry-pilM*. **b** Accumulation levels of mCherry-PilM. Protein from  $3 \times 10^8$  cells of the indicated genotypes were loaded per lane and blots probed with  $\alpha$ -PilM,  $\alpha$ -mCherry and  $\alpha$ -PilC antibodies (loading control). Note that the  $\alpha$ -PilM antibodies detect an additional band at 35 kDa, which is non-specific as it is also observed in cell extracts of the  $\Delta pilM$  mutant. Also,  $\alpha$ -PilM as well as  $\alpha$ -mCherry antibodies detect a protein, which is likely a truncated variant of mCherry-PilM. **c** Accumulation level of mCherry-PilM in comparison to native PilM. Protein from  $3 \times 10^8$  cells were loaded per lane and the blots probed with  $\alpha$ -PilM,  $\alpha$ -mCherry and  $\alpha$ -LonD antibodies (loading control). In order to detect native PilM with the  $\alpha$ -PilM antibodies,

SDS-PAGE was done to better separate proteins with a MW between 35 and 70 kDa. Proteins with their calculated molecular masses and positions of molecular markers are indicated. Source data are provided as a Source Data file.

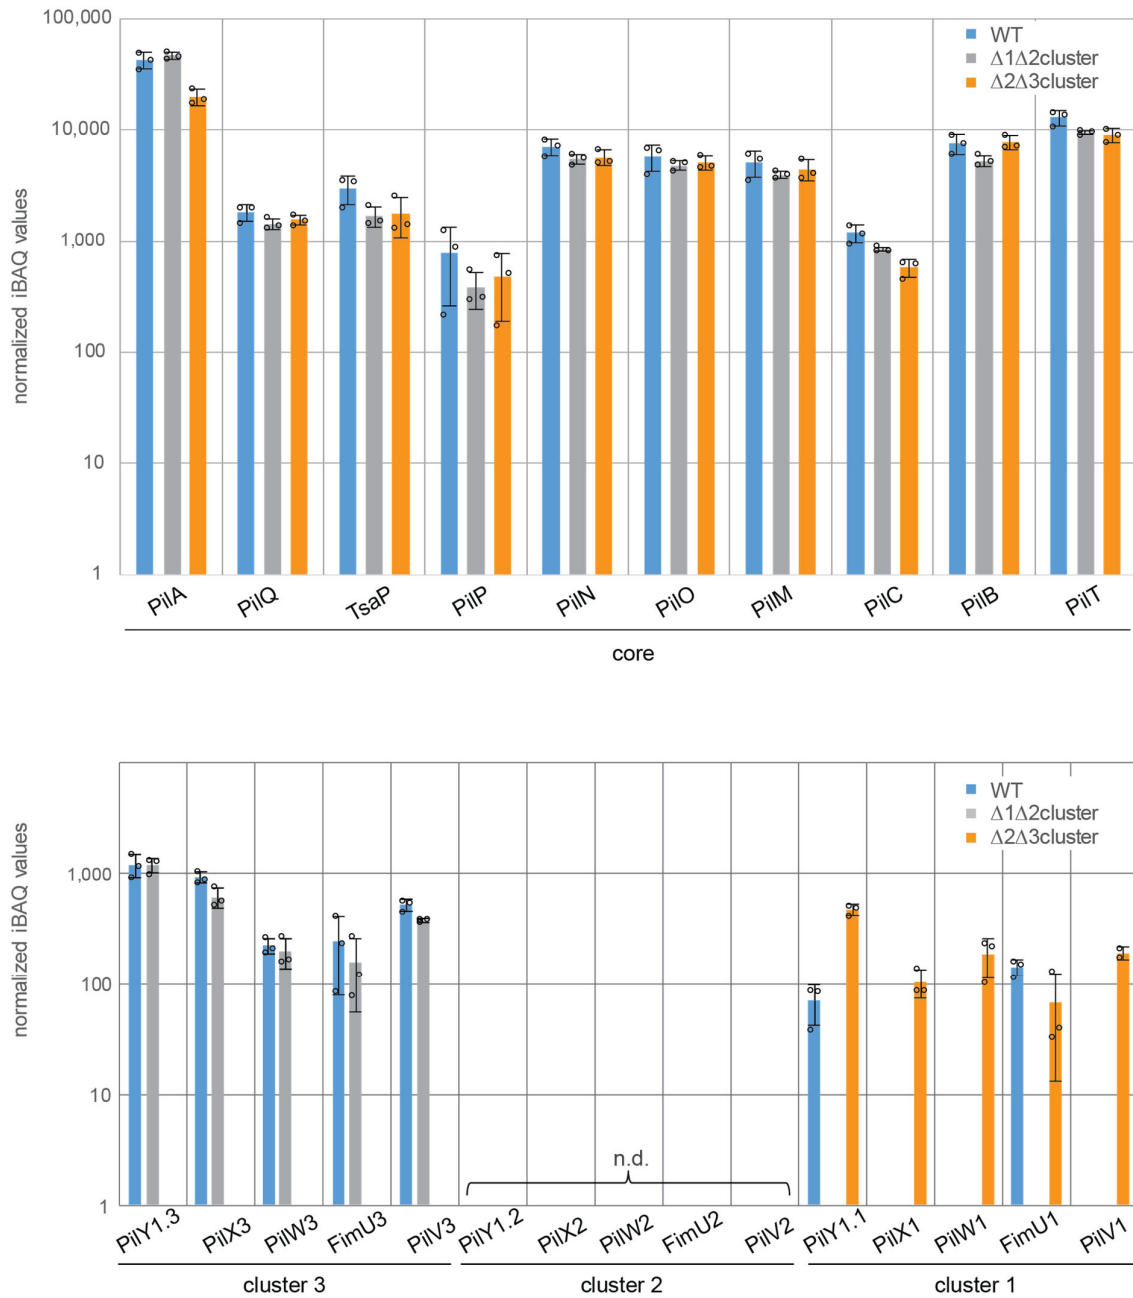

**Supplementary Figure 5. Accumulation levels of T4aPM proteins, minor pilins and PilY1 proteins**

Strains of the indicated genotypes were grown on 1% CTT 1.5% agar, total cell extract isolated, samples analyzed by LFQ-MS, and mean normalized iBAQ values (absolute values/10,000) calculated. The upper diagram depicts the accumulation levels of the core proteins, while the bottom diagram depicts the accumulation levels of minor pilins and PilY1 proteins of the three clusters. Columns and error bars, mean  $\pm$  standard deviations from three biological replicates, dots represent the corresponding data points; n.d., not detected. Source data are provided as a Source Data file.



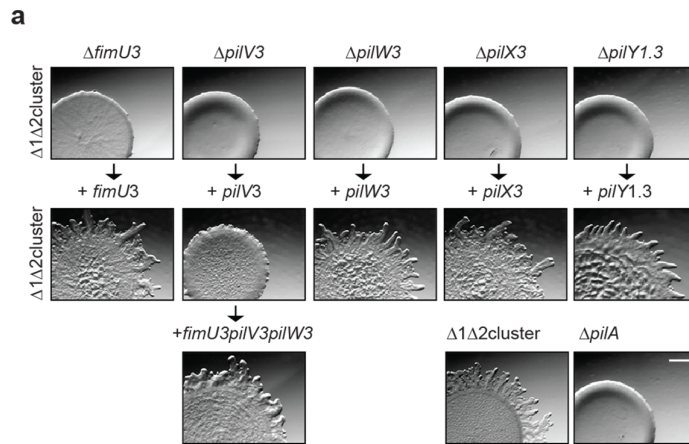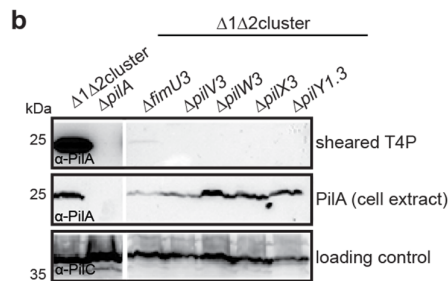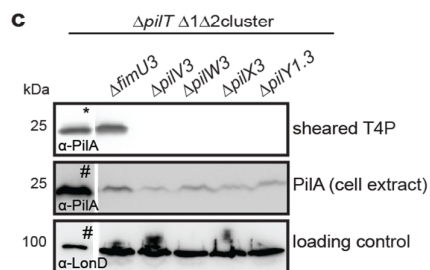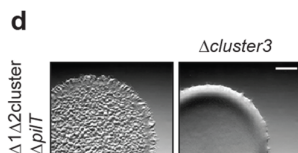

### Supplementary Figure 6. Cluster\_3 proteins are important for T4aP-dependent motility and T4aP extension

**a** Effect of single gene deletions in cluster\_3 in a  $\Delta 1\Delta 2$ cluster mutant on T4aP-dependent motility (top row). The indicated *M. xanthus* strains were incubated at for 24 h. Middle row, strains with ectopic expression of the deleted gene from the *pilA* promoter on plasmids integrated in a single copy at the Mx8 *attB* site in the corresponding strain. Bottom row, in the case of the  $\Delta pilV3$  mutant, efficient complementation was only observed upon co-expression with *fimU3* and *pilW3*, the genes *pilV3* is translationally coupled to (Fig. 1b). Control strains are shown to the right in the bottom row. Scale bar, 1 mm. **b** Effect of single gene deletions in cluster\_3 in a  $\Delta 1\Delta 2$ cluster mutant on T4aP formation. Samples were

prepared as in Fig. 1d.  $\alpha$ -PilC antibodies were used as a loading control. **c** Effect of additional deletion of *pilT* on T4aP formation in strains with single gene deletions in cluster\_3 in a  $\Delta 1\Delta 2$  cluster mutant. Samples were prepared as in (b). Pili as well as total cell extract from a  $\Delta 1\Delta 2$  cluster  $\Delta pilT$  mutant have increased levels of PilA. For better comparison, 5% of T4aP sheared from the  $\Delta 1\Delta 2$  cluster  $\Delta pilT$  strain (\*) and 25% of cell extract of the  $\Delta 1\Delta 2$  cluster  $\Delta pilT$  strain (#) were applied.  $\alpha$ -LonD antibodies were used as a loading control. **d** Effect of additional deletion of *pilT* on T4aP-dependent motility in a strain with a deletion of cluster\_3 in a  $\Delta 1\Delta 2$  cluster mutant background. Cells were treated as in (a). Gaps between lanes in immunoblots indicate lanes that were deleted for presentation purposes. Source data are provided as a Source Data file.

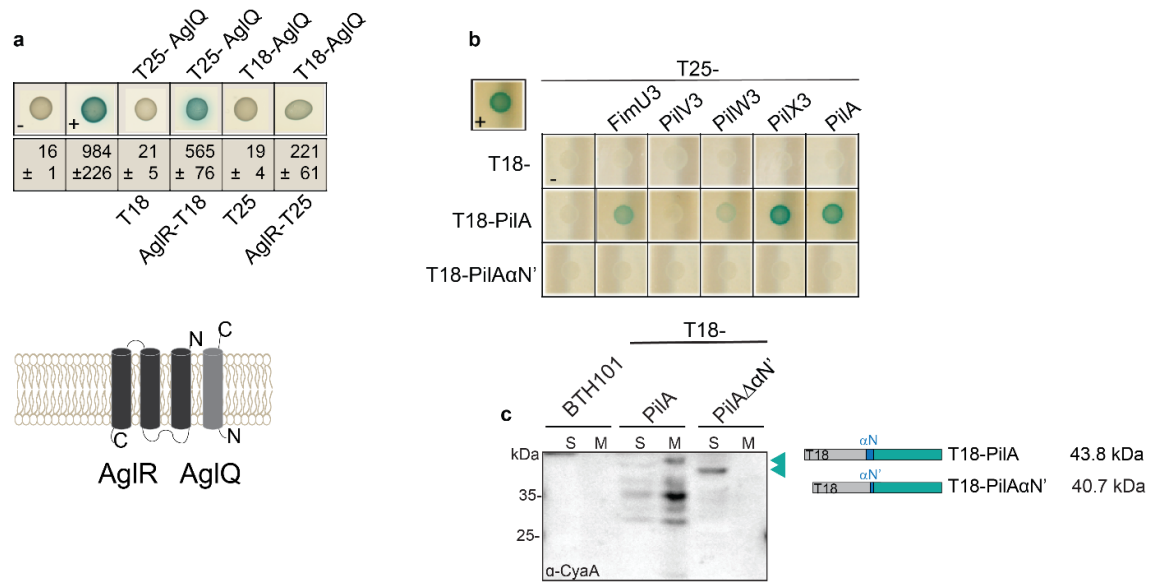

### Supplementary Figure 7. Interactions between PilA and minor pilins depend on PilA localization in the inner membrane

**a** AglQ and AglR interact in the BACTH.

T25 and T18 were fused to the N-terminus of AglQ and to the C-terminus of AglR. Positive control (plus) T25-Zip + T18-Zip; negative control (minus), T18 + T25. For every tested interaction pair, four clones were tested with similar results. Representative images are shown of *E. coli* BTH101 containing the indicated fusions; the specific activity of  $\beta$ -galactosidase is shown as mean  $\pm$  s.d. (n=4). Schematic, topology of the AglQ and AglR proteins in the IM<sup>2</sup>. **b** Interactions between PilA and cluster\_3 minor pilins as well as PilA depend on the N-terminal segment of the N-terminal  $\alpha$ -helix in PilA. T25 was fused to the N-terminus of the mature, full-length minor pilins and PilA (See Fig. 2b); T18 was fused to the N-terminus of either mature, full-length PilA (T18-PilA) or a PilA variant lacking the 28 N-terminal amino acids of the mature PilA (T18-PilA $\alpha$ N'), which anchor PilA in the IM (see Supplementary Fig. 1). Positive and negative controls as in (a). For every interaction pair, four clones were tested with similar results in two independent biological experiments. Representative images of *E. coli* BTH101 expressing the indicated protein fusions are shown. **c** Fractionation of *E. coli* BTH101 cells expressing full-length, mature PilA or the PilA $\alpha$ 1N' variant fused to T18. Cleared cell lysates from  $4 \times 10^{10}$  cells were fractionated into soluble (S) and membrane (M) fractions. Protein from  $1.4 \times 10^9$  cells were loaded per lane. Blots were probed with  $\alpha$ -CyaA. Proteins with their calculated molecular masses and positions of molecular markers are indicated. Schematics on the right, domain organization and calculated molecular sizes of the corresponding proteins. Source data are provided as a Source Data file.

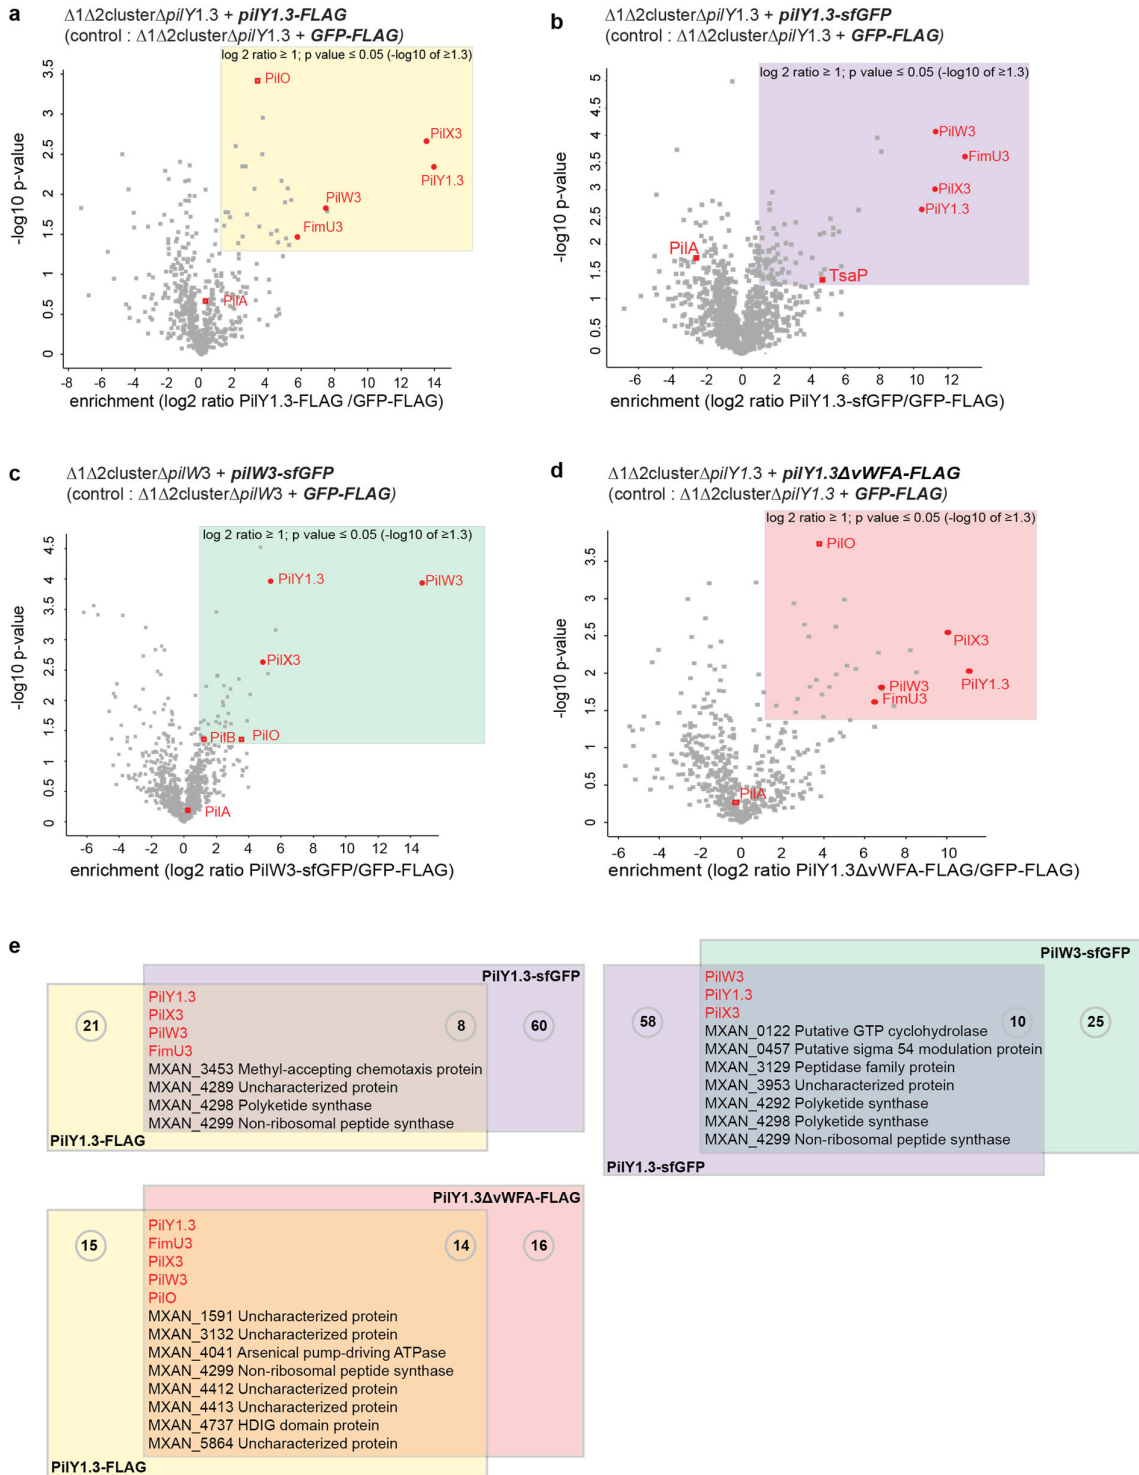

**Supplementary Figure 8. Cluster\_3 minor pilins and PiiY1.3 interact.**

**a-d** Volcano plots of pull-downs with tagged PiiY1.3 and PiiW3. For all experiments, samples from two biological replicates and two negative controls were analyzed by LFQ-MS, mean iBAQ values and log<sub>2</sub>-fold enrichment in experimental samples compared to GFP-FLAG samples calculated. X-axis, enrichment (log<sub>2</sub> ratio) of proteins in experimental samples with

the indicated bait protein in the indicated strain versus the control sample obtained from an isogenic strain expressing a GFP-FLAG protein. Y-axis,  $-\log_{10}$  of P-value. Significantly enriched proteins in the experimental samples ( $\log_2$  ratio  $\geq 1$ ; P-value  $\leq 0.05$  ( $-\log_{10} \geq 1.3$ )) are included in shaded boxes. PilY1.3, minor pilins and proteins of the T4aPM are shown in red. **e** Venn diagrams of significantly enriched proteins in pull-down experiments with the indicated bait proteins. In the pairwise comparisons, proteins known to be related to T4aPM function are indicated in red. None of the remaining proteins have been implicated in T4aPM function and with the exception of MXAN\_3129, \_3453 and \_4737, all these proteins are predicted to be cytoplasmic. Based on sequence analyses, MXAN\_3129 is predicted to be a periplasmic protein, and \_3453 as well as \_4737 are predicted to be inner membrane proteins. Source data are provided as a Source Data file.

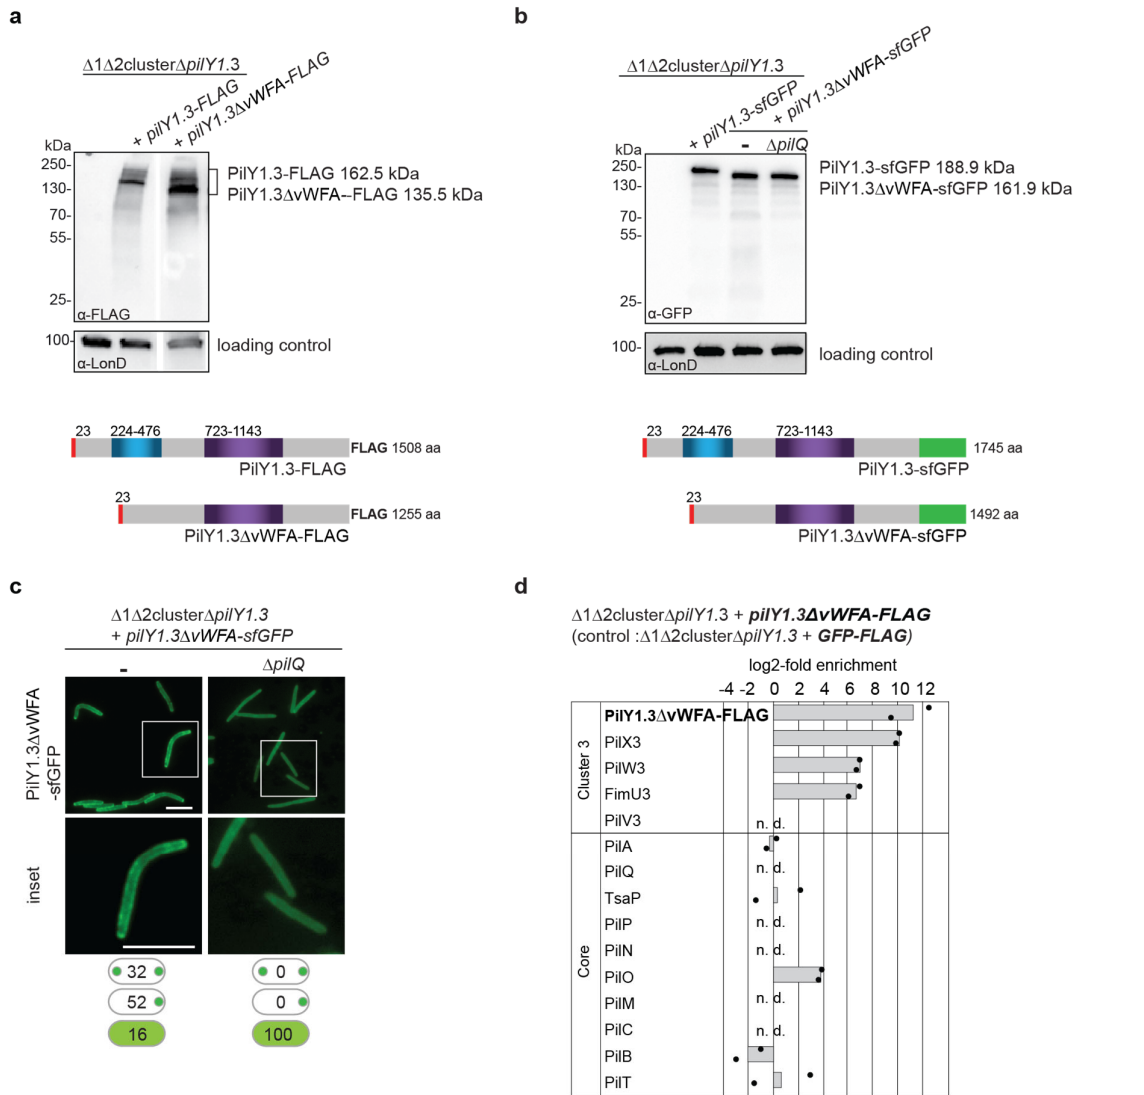

### Supplementary Figure 9. PilY1.3 $\Delta$ vWFA-FLAG interacts with minor pilins.

**a** Accumulation levels of PilY1.3 $\Delta$ vWFA-FLAG. Protein from  $3 \times 10^8$  cells of the indicated genotypes were loaded per lane and blots probed with  $\alpha$ -FLAG and  $\alpha$ -LonD antibodies (loading control). Below, the domain structures of FLAG-tagged full-length PilY1.3 and PilY1.3 $\Delta$ vWFA is shown. **b** Accumulation levels of PilY1.3 $\Delta$ vWFA-sfGFP. Protein from  $3 \times 10^8$  cells of the indicated genotypes were loaded per lane and blots probed with  $\alpha$ -GFP and  $\alpha$ -LonD antibodies (loading control). Below, the domain structures of sfGFP-tagged full-length PilY1.3 and PilY1.3 $\Delta$ vWFA are shown. **c** Fluorescence microscopy and analysis of mutants as in Fig. 1g. Insets are enlargements of the boxed areas. N > 100 per strain; localization patterns in % indicated in schematics (bipolar, unipolar, diffuse (top-to-bottom)). Scale bars, 5  $\mu$ m. Note that the fluorescent polar clusters formed by PilY1.3 $\Delta$ vWFA-sfGFP were smaller and of lower intensity than those formed by full-length PilY1.3-sfGFP (Fig. 3f; Supplementary Fig. 10c). **d** PilY1.3 $\Delta$ vWFA-FLAG and cluster\_3 minor pilins interact. Pull-down experiments with  $\alpha$ -FLAG matrix on cell extracts from strain of indicated genotype expressing PilY1.3 $\Delta$ vWFA-FLAG or GFP-FLAG (negative control). Samples from two biological

replicates and two negative controls were analyzed by LFQ-MS, mean iBAQ values and log<sub>2</sub>-fold enrichment in PiiY1.3ΔvWFA-FLAG samples compared to GFP-FLAG samples calculated; enrichment for PiiY1.3-FLAG was imputed. Columns represent mean of log<sub>2</sub>-fold enrichment (n=2), dots represent the corresponding data points, n.d., not detected in PiiY1.3ΔvWFA-FLAG samples. Source data are provided as a Source Data file.

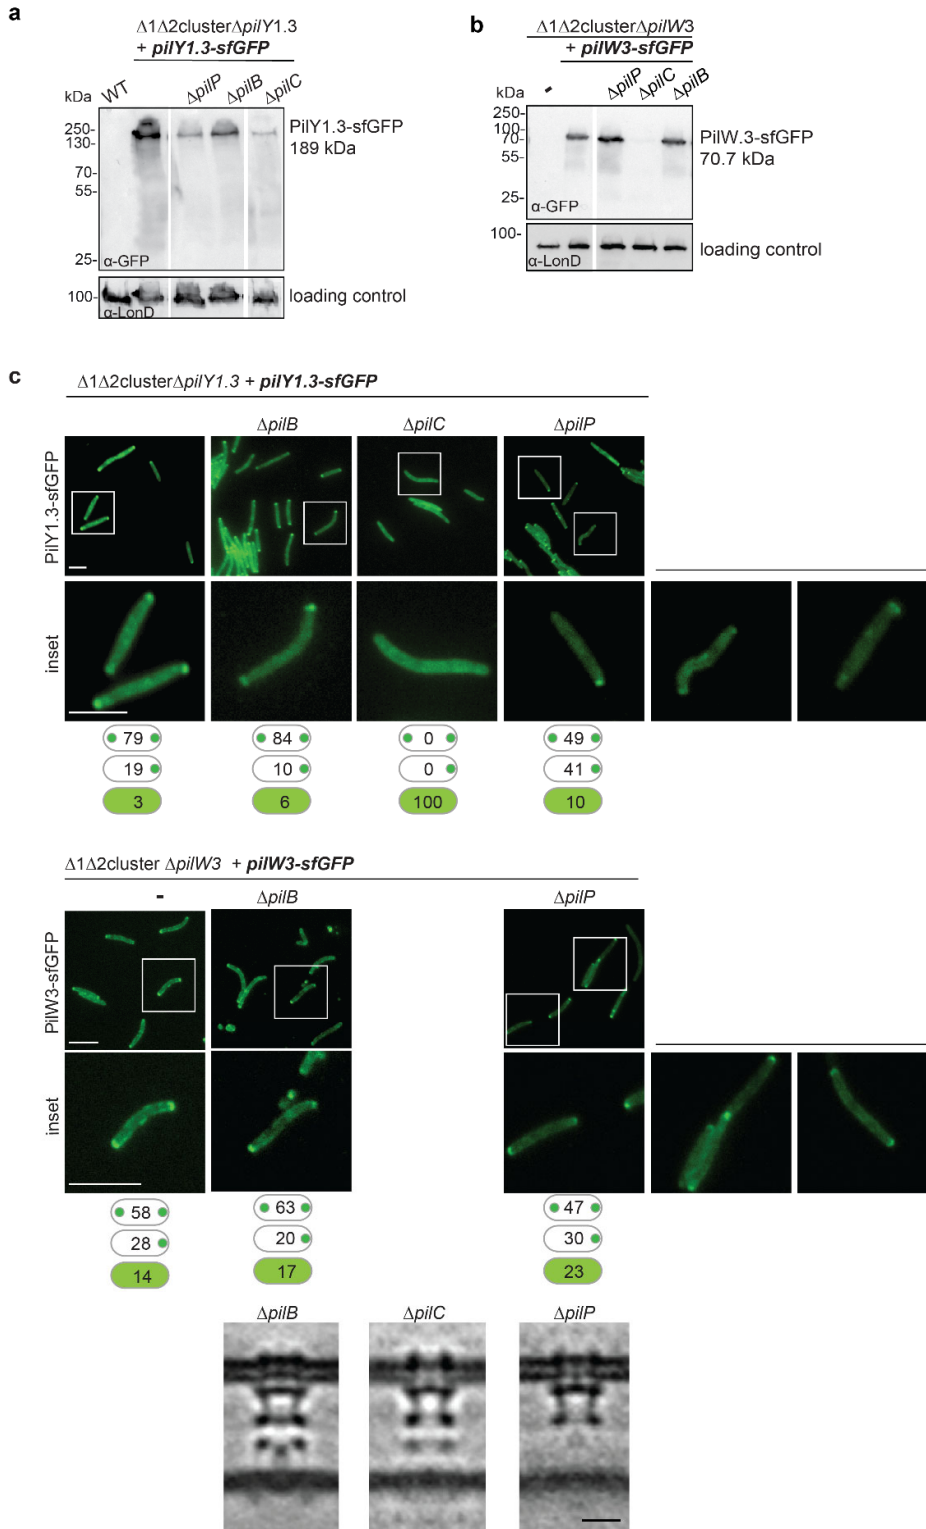

**Supplementary Figure 10. PilW3-sfGFP and PilY1.3-sfGFP accumulation and localization**

**a, b** Accumulation levels of PilY1.3-sfGFP (**a**) and PilW3-sfGFP (**b**) in strains of the indicated



genotypes. Protein from  $3 \times 10^8$  cells were loaded per lane and blots probed with  $\alpha$ -GFP and  $\alpha$ -LonD antibodies (loading control). Gaps between lanes indicate lanes that were deleted for presentation purposes. **c** Correlation between PilY1.3-sfGFP and PilW3-sfGFP polar localization and presence of the short stem and plug in subtomogram averages of the non-piliated T4aPM. Fluorescence microscopy and analysis of mutants as in Fig. 1g. Insets are enlargements of the boxed areas. N >100 per strain; localization patterns in % indicated in schematics (bipolar, unipolar, diffuse (top-to-bottom)). Scale bars, 5  $\mu$ m. Note that in the two  $\Delta pilP$  strains, the fluorescent polar clusters were smaller and of lower intensity than in WT. In the  $\Delta pilP$  mutant, the rudimentary T4aPM only contains PilQ and TsaP among the 10 core proteins<sup>3</sup>. Subtomogram averages of mutants with the indicated phenotype are from<sup>3</sup> (Reprinted with permission from AAAS). Scale bar, 10 nm. Note that fluorescence microscopy was performed on strains deleted for cluster\_1 and \_2 while the subtomogram averages are from mutants containing all three minor pilins/PilY1 clusters. However, the structure (subtomogram average) of the T4aPM in a strain deleted for cluster\_1 and cluster\_2 appeared essentially identical to that of WT (Fig. 4a). Source data are provided as a Source Data file.

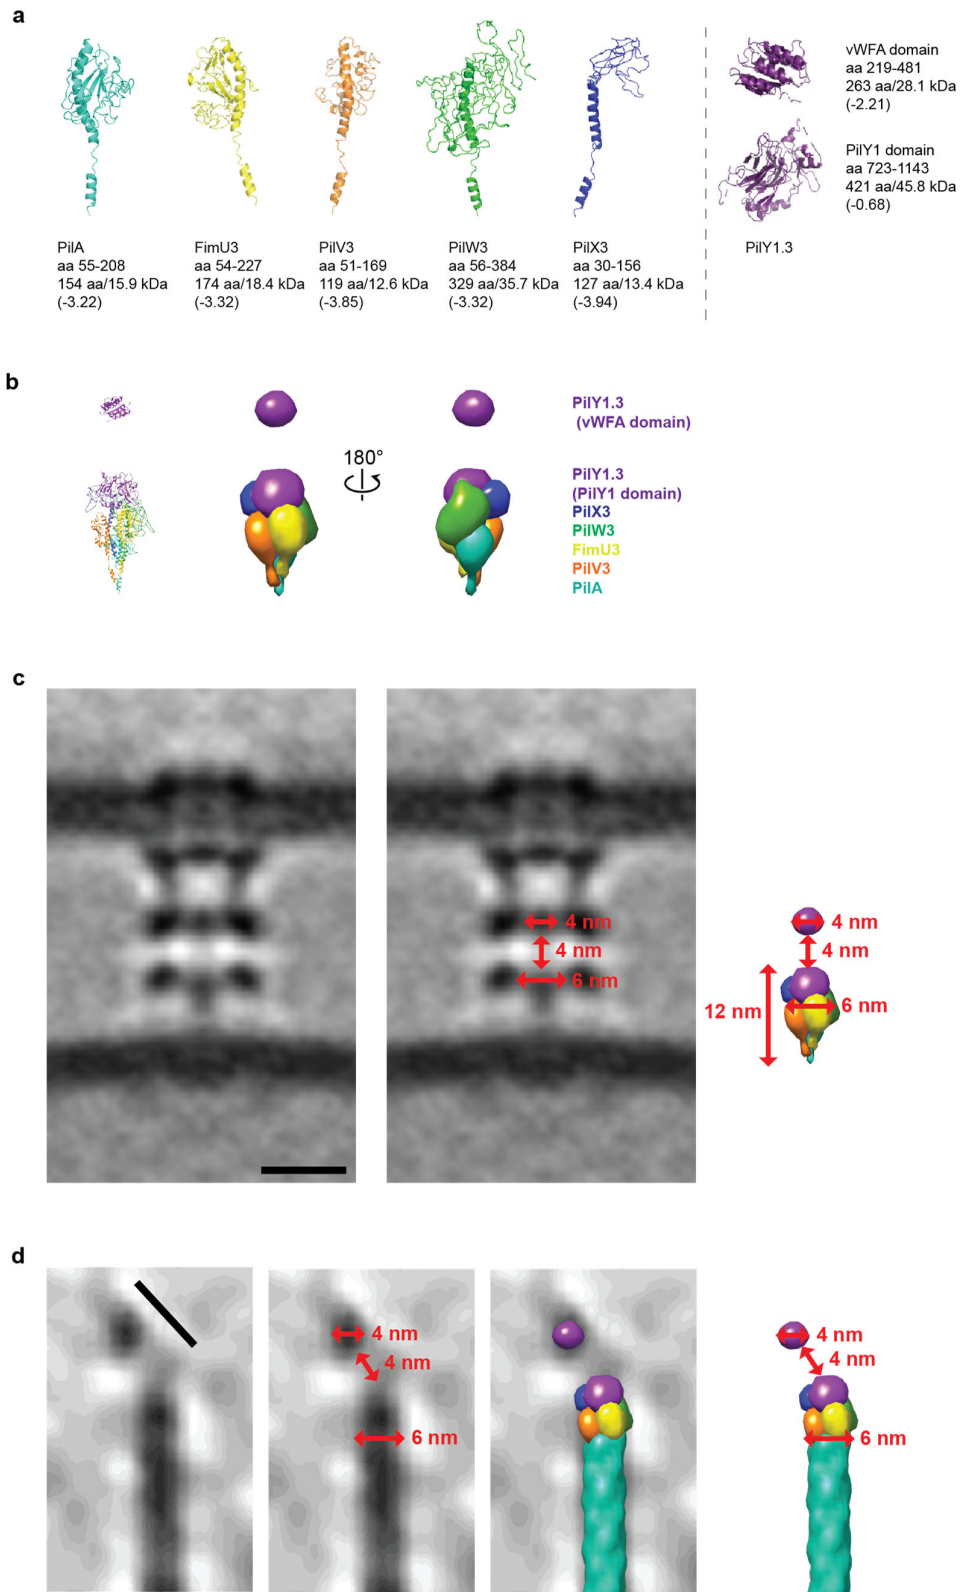

**Supplementary Figure 11. Generation of hypothetical structural model of the T4aPM priming complex.**

**a** Left panel, I-TASSER homology models were generated for the globular domains of PilA and the minor pilins of cluster\_3 in *M. xanthus*. Subsequently, these models replaced the corresponding regions in the PilE structure from *N. gonorrhoeae* (5VXX)<sup>4</sup>. Right panel, I-TASSER homology models of the two conserved domains of *M. xanthus* PilY1.3. C-scores are expressed in numbers from -5 to +2, with +2 indicating high confidence. C-scores for the homology models are depicted below or next to the models in brackets. Amino acids included in the homology models are indicated together with their molecular masses. **b** Hypothetical structural model of priming complex shown in ribbon diagrams and molecular envelope filtered to 3 nm resolution in two orientations. Color code for individual proteins is shown on the right. **c** Dimensions of priming complex in the non-piliated WT T4aPM. Left panel, subtomogram average of WT T4aPM, scale bar, 10 nm; middle panel, subtomogram average of WT T4aPM with double-headed arrows indicating 4 and 6 nm lengths; right panel, dimensions of the hypothetical structural model of the priming complex filtered to 3 nm resolution and with color code as in **b**. **d** Dimensions of kinked pilus tip structure. 1<sup>st</sup> panel, cryo-EM image of kinked T4aP tip structure with a density gap between terminal globular density and the tip of the pilus shaft; scale bar, 10 nm. 2<sup>nd</sup> panel, the same cryo-EM image as in 1<sup>st</sup> panel with double-headed arrows indicating 4 and 6 nm lengths. 3<sup>rd</sup> panel, the same cryo-EM image as in 1<sup>st</sup> panel fitted with the hypothetical structural model of priming complex and the structure of the *N. gonorrhoeae* T4aP filament<sup>4</sup> together filtered to 3 nm resolution; color code as in **b**. 4<sup>th</sup> panel, hypothetical structural model of priming complex filtered to 3 nm with double-headed arrows indicating 4 and 6 nm lengths.

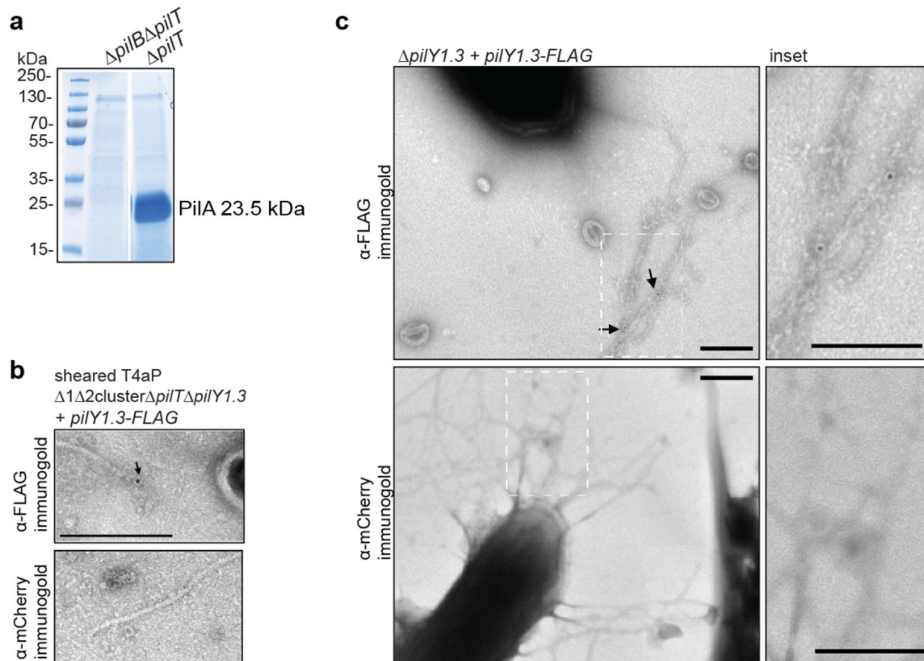

**Supplementary Figure 12. Purification of T4aP and immuno-gold staining of *M. xanthus* T4aP and cells expressing PilY1.3-FLAG.**

**a** Purification of T4aP. T4aP from the hyper-piliated  $\Delta pilT$  strain were purified, separated by SDS-PAGE and visualized by Coomassie protein staining. As a negative control, T4aP from the same amount of non-piliated  $\Delta pilB\Delta pilT$  cells was loaded. Gap between lanes indicate lanes deleted for presentation purposes. **b, c** PilY1.3-FLAG is present in T4aP from cells containing PilY1.3-FLAG. Immuno-gold localization using rabbit  $\alpha$ -FLAG antibodies and gold-conjugated (10 nm) sheep  $\alpha$ -rabbit antibodies on sheared T4aP (**b**) (top panel) and cells of the indicated genotype expressing PilY1.3-FLAG (**c**) (top panel). Gold particles are indicated by arrows. Lower panels are controls in which T4aP (**b**) and cells (**c**) were first stained with rabbit  $\alpha$ -mCherry antibodies and then with the gold-conjugated sheep  $\alpha$ -rabbit antibodies. In **c**, the areas in the stippled boxes are shown magnified on the right. Scale bar, 200 nm. Source data are provided as a Source Data file.

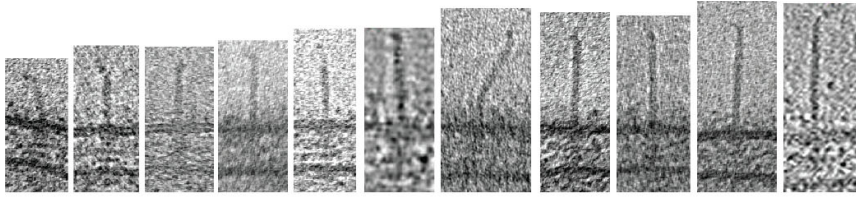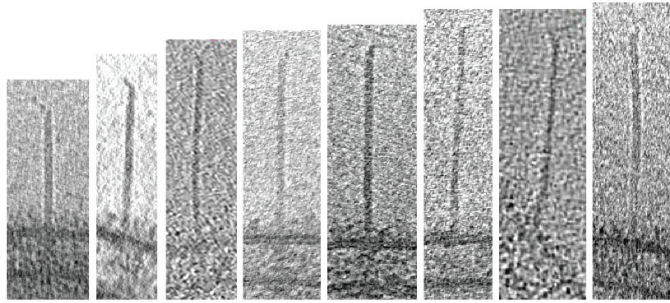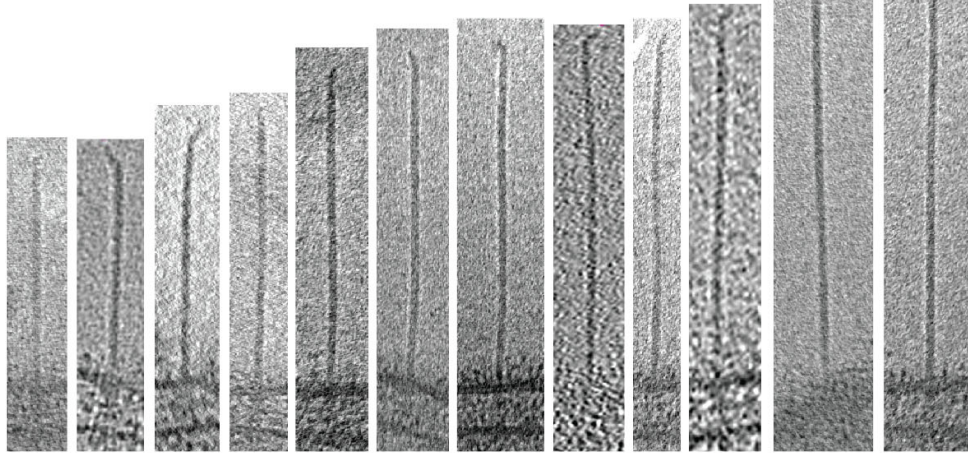

n=31  
pili tips  
with  
a visible tip structure

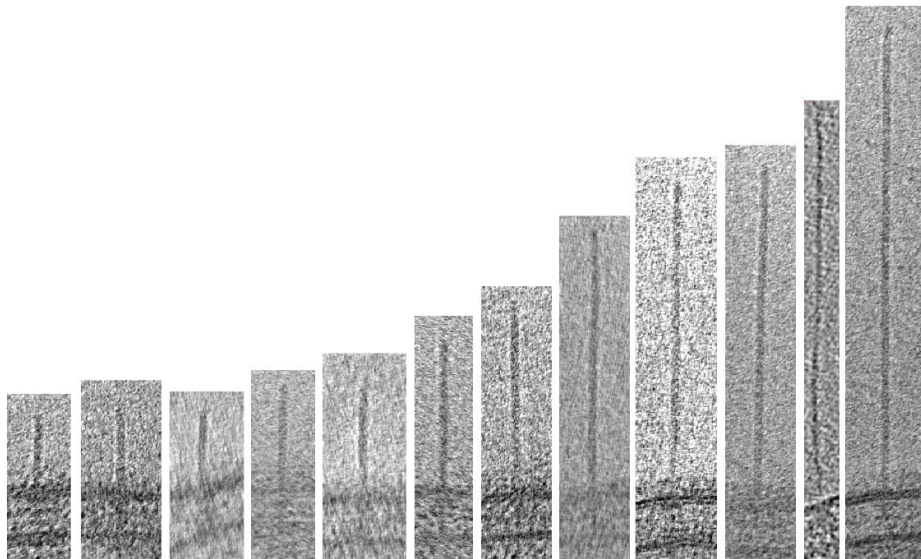

n=12  
pili tips  
without  
a visible tip structure

**Supplementary Figure 13. Cryo-electron microscopy images of T4aP attached to *M. xanthus* cells**

T4aP that could be traced from the cell surface to the pilus tip (n=43) sorted according to length. T4aP in which a kinked tip was visible are shown at the top and T4aP in which this structure is not visible are shown at the bottom. Scale bar, 50 nm.

**Supplementary Table 1.** *M. xanthus* and *E. coli* strains and plasmids used in this work

| Strain                   | Description/Genotype <sup>1</sup>                 | Reference or source |
|--------------------------|---------------------------------------------------|---------------------|
| <b><i>M. xanthus</i></b> |                                                   |                     |
| DK1622                   | wildtype                                          | 5                   |
| SA6839                   | $\Delta 1pilY1$ ( $\Delta$ MXAN_0362)             | This study          |
| SA6840                   | $\Delta 2pilY1$ ( $\Delta$ MXAN_1020)             | This study          |
| SA6841                   | $\Delta 3pilY1$ ( $\Delta$ MXAN_1365)             | This study          |
| SA6842                   | $\Delta 1\Delta 2pilY1$                           | This study          |
| SA6849                   | $\Delta 1\Delta 3pilY1$                           | This study          |
| SA6884                   | $\Delta 2\Delta 3pilY1$                           | This study          |
| SA6852                   | $\Delta 1\Delta 2\Delta 3pilY1$                   | This study          |
| SA6850                   | $\Delta 1pilX$ ( $\Delta$ MXAN_0364)              | This study          |
| SA6856                   | $\Delta 2pilX$ ( $\Delta$ MXAN_1021)              | This study          |
| SA7604                   | $\Delta 3pilX$ ( $\Delta$ MXAN_1366)              | This study          |
| SA6885                   | $\Delta 1\Delta 2pilX$                            | This study          |
| SA7605                   | $\Delta 1\Delta 3pilX$                            | This study          |
| SA7611                   | $\Delta 2\Delta 3pilX$                            | This study          |
| SA7607                   | $\Delta 1\Delta 2\Delta 3pilX$                    | This study          |
| SA6877                   | $\Delta 1$ cluster ( $\Delta$ MXAN_0359-0364)     | This study          |
| SA6876                   | $\Delta 2$ cluster ( $\Delta$ MXAN_1021-1017)     | This study          |
| SA6891                   | $\Delta 3$ cluster ( $\Delta$ MXAN_1365-1369)     | This study          |
| SA6888                   | $\Delta 1\Delta 2$ cluster                        | This study          |
| SA6892                   | $\Delta 2\Delta 3$ cluster                        | This study          |
| SA6899                   | $\Delta 1\Delta 3$ cluster                        | This study          |
| SA7609                   | $\Delta 1\Delta 2\Delta 3$ cluster                | This study          |
| SA6794                   | $\Delta 1pilVpilWfimU$ ( $\Delta$ MXAN_0359-0361) | 3                   |
| SA6819                   | $\Delta 2pilVpilWfimU$ ( $\Delta$ MXAN_1017-1019) | 3                   |
| SA6796                   | $\Delta 3pilVpilWfimU$ ( $\Delta$ MXAN_1367-1369) | 3                   |
| SA6818                   | $\Delta 1\Delta 2pilVpilWfimU$                    | 3                   |

|         |                                                                                      |            |
|---------|--------------------------------------------------------------------------------------|------------|
| SA6810  | $\Delta 2\Delta 3pilVpilWfimU$                                                       | 3          |
| SA6816  | $\Delta 1\Delta 3pilVpilWfimU$                                                       | 3          |
| SA6815  | $\Delta 1\Delta 2\Delta 3pilVpilWfimU$                                               | 3          |
| DK10410 | $\Delta pilA$ ( $\Delta$ MXAN_5783)                                                  | 6          |
| DK10409 | $\Delta pilT$ ( $\Delta$ MXAN_5787)                                                  | 6          |
| SA7667  | $\Delta 1\Delta 2\Delta 3pilY1\Delta pilT$                                           | This study |
| SA7665  | $\Delta 1\Delta 2\Delta 3pilX\Delta pilT$                                            | This study |
| SA7666  | $\Delta 1\Delta 2\Delta 3cluster\Delta pilT$                                         | This study |
| SA7664  | $\Delta 1\Delta 2\Delta 3pilVpilWfimU\Delta pilT$                                    | This study |
| SA7654  | $\Delta 1\Delta 2cluster\Delta fimU3$ ( $\Delta$ MXAN_1369)                          | This study |
| SA7660  | $\Delta 1\Delta 2cluster\Delta pilV3$ ( $\Delta$ MXAN_1368)                          | This study |
| SA7659  | $\Delta 1\Delta 2cluster\Delta pilW3$ ( $\Delta$ MXAN_1367)                          | This study |
| SA7655  | $\Delta 1\Delta 2cluster\Delta pilX3$ ( $\Delta$ MXAN_1366)                          | This study |
| SA7661  | $\Delta 1\Delta 2cluster\Delta pilY1.3$ ( $\Delta$ MXAN_1365)                        | This study |
| SA7894  | $\Delta 1\Delta 2cluster\Delta fimU3$ , <i>attB::PpilA-fimU3</i> (pMAT223)           | This study |
| SA8603  | $\Delta 1\Delta 2cluster\Delta pilV3$ , <i>attB::PpilA-pilV3</i> (pMAT224)           | This study |
| SA7895  | $\Delta 1\Delta 2cluster\Delta pilW3$ , <i>attB::PpilA-pilW3</i> (pMAT225)           | This study |
| SA8601  | $\Delta 1\Delta 2$ cluster $\Delta pilX3$ , <i>attB::PpilA-pilX3</i> (pMAT338)       | This study |
| SA7684  | $\Delta 1\Delta 2$ cluster $\Delta pilY1.3$ , <i>attB::PpilA-pilY1.3</i> (pMAT212)   | This study |
| SA8694  | $\Delta 1\Delta 2cluster\Delta pilV3$ , <i>attB::PpilA-fimU3pilV3pilW3</i> (pMAT229) | This study |
| SA7718  | $\Delta 1\Delta 2cluster\Delta pilT$                                                 | This study |
| SA7690  | $\Delta 1\Delta 2cluster\Delta fimU3\Delta pilT$                                     | This study |
| SA7689  | $\Delta 1\Delta 2cluster\Delta pilV3\Delta pilT$                                     | This study |
| SA7688  | $\Delta 1\Delta 2cluster\Delta pilW3\Delta pilT$                                     | This study |
| SA7691  | $\Delta 1\Delta 2cluster\Delta pilX3\Delta pilT$                                     | This study |
| SA7709  | $\Delta 1\Delta 2cluster\Delta pilY1.3\Delta pilT$                                   | This study |
| SA6024  | $\Delta pilBTCMNOPQ$                                                                 | 7          |
| SA6011  | $\Delta tsaP$ ( $\Delta$ MXAN_3001)                                                  | 8          |
| SA7896  | <i>mCherry-pilM</i>                                                                  | This study |



|         |                                                                                                |              |
|---------|------------------------------------------------------------------------------------------------|--------------|
| SA8624  | $\Delta 1\Delta 2\Delta 3pilVpilWfimU$ , <i>mCherry-pilM</i>                                   | This study   |
| SA8625  | $\Delta 1\Delta 2\Delta 3pilY1$ , <i>mCherry-pilM</i>                                          | This study   |
| SA8685  | $\Delta 1\Delta 2\Delta 3pilX$ , <i>mCherry-pilM</i>                                           | This study   |
| SA8686  | $\Delta 1\Delta 2\Delta 3cluster$ , <i>mCherry-pilM</i>                                        | This study   |
| SA8721  | $\Delta pilQ$ , <i>mCherry-pilM</i>                                                            | This study   |
| SA3002  | $\Delta pilM$ ( $\Delta MXAN\_5776$ )                                                          | <sup>9</sup> |
| SA7883  | $\Delta 1\Delta 2cluster\Delta pilY1.3$ , <i>attB::PpilA-pilY1.3-FLAG</i> (pMAT209)            | This study   |
| SA7791  | $\Delta 1\Delta 2cluster\Delta pilY1.3$ , <i>attB::PpilA-pilY1.3-sfGFP</i> (pMAT321)           | This study   |
| SA8674  | $\Delta 1\Delta 2cluster\Delta pilY1.3\Delta pilQ$ , <i>attB::PpilA-pilY1.3-sfGFP</i>          | This study   |
| SA7890  | $\Delta 1\Delta 2cluster\Delta pilY1.3$ , <i>attB::PpilA-GFP-FLAG</i> (pMAT219)                | This study   |
| SA8704  | $\Delta 1\Delta 2\Delta 3cluster$ , <i>attB::PpilA-pilY1.3-sfGFP</i>                           | This study   |
| SA8791  | $\Delta 1\Delta 2cluster\Delta pilY1.3\Delta fimU3$ , <i>attB::PpilA-pilY1.3-sfGFP</i>         | This study   |
| SA8797  | $\Delta 1\Delta 2cluster\Delta pilY1.3\Delta pilV3$ , <i>attB::PpilA-pilY1.3-sfGFP</i>         | This study   |
| SA8796  | $\Delta 1\Delta 2cluster\Delta pilY1.3\Delta pilW3$ , <i>attB::PpilA-pilY1.3-sfGFP</i>         | This study   |
| SA8795  | $\Delta 1\Delta 2cluster\Delta pilY1.3\Delta pilX3$ , <i>attB::PpilA-pilY1.3-sfGFP</i>         | This study   |
| SA7793  | $\Delta 1\Delta 2cluster\Delta pilY1.3\Delta pilB$ , <i>attB::PpilA-pilY1.3-sfGFP</i>          | This study   |
| SA8680  | $\Delta 1\Delta 2cluster\Delta pilY1.3\Delta pilA$ , <i>attB::PpilA-pilY1.3-sfGFP</i>          | This study   |
| SA8695  | $\Delta 1\Delta 2cluster\Delta pilY1.3\Delta pilC$ , <i>attB::PpilA-pilY1.3-sfGFP</i>          | This study   |
| SA8681  | $\Delta 1\Delta 2cluster\Delta pilY1.3\Delta pilP$ , <i>attB::PpilA-pilY1.3-sfGFP</i>          | This study   |
| SA8764  | $\Delta 1\Delta 2cluster\Delta pilY1.3$ , <i>attB::PpilA-pilY1.3\Delta vWFA-FLAG</i> (pMAT393) | This study   |
| SA7886  | $\Delta 1\Delta 2cluster\Delta pilW3$ , <i>attB::PpilA-pilW3-sfGFP</i> (pMAT332)               | This study   |
| SA11305 | $\Delta 1\Delta 2cluster\Delta pilW3$ , <i>attB::PpilA-GFP-FLAG</i> (pMAT219)                  | This study   |
| SA11326 | $\Delta 1\Delta 2cluster\Delta pilW3\Delta pilQ$ , <i>attB::PpilA-pilW3-sfGFP</i> (pMAT332)    | This study   |
| SA11325 | $\Delta 1\Delta 2cluster\Delta pilW3\Delta pilP$ , <i>attB::PpilA-pilW3-sfGFP</i> (pMAT332)    | This study   |
| SA11313 | $\Delta 1\Delta 2cluster\Delta pilW3\Delta pilC$ , <i>attB::PpilA-pilW3-sfGFP</i> (pMAT332)    | This study   |
| SA11310 | $\Delta 1\Delta 2cluster\Delta pilW3\Delta pilB$ , <i>attB::PpilA-pilW3-sfGFP</i> (pMAT332)    | This study   |
| SA11312 | $\Delta 1\Delta 2cluster\Delta pilW3\Delta pilA$ , <i>attB::PpilA-pilW3-sfGFP</i> (pMAT332)    | This study   |
| SA11303 | $\Delta 1\Delta 2cluster\Delta pilW3\Delta pilY1.3$ , <i>attB::PpilA-pilW3-sfGFP</i> (pMAT332) | This study   |

|                       |                                                                                                                                     |            |
|-----------------------|-------------------------------------------------------------------------------------------------------------------------------------|------------|
| SA11339               | $\Delta 1\Delta 2$ cluster $\Delta pilY1.3$ , <i>attB::PpilA-pilY1.3<math>\Delta vWFA</math>- <i>sfGFP</i> (pMAT432)</i>            | This study |
| SA11344               | $\Delta 1\Delta 2$ cluster $\Delta pilY1.3\Delta pilQ$ , <i>attB::PpilA-pilY1.3<math>\Delta vWFA</math>- <i>sfGFP</i> (pMAT432)</i> | This study |
| SA7729                | $\Delta 1\Delta 2$ cluster $\Delta pilY1.3\Delta pilT$ <i>attB::PpilA-pilY1.3-FLAG</i> (pMAT209)                                    | This study |
| SA6700                | $\Delta pilB\Delta pilT$                                                                                                            | 3          |
| SA8728                | $\Delta pilY1.3$ , <i>attB::PpilA-pilY1.3-FLAG</i> (pMAT209)                                                                        | This study |
| <b><i>E. coli</i></b> |                                                                                                                                     |            |
| Mach1™-T1R            | F- $\phi 80(lacZ)\Delta M15 \Delta lacX74 hsdR(rK-mK+) \Delta recA1398 endA1 tonA$                                                  | Invitrogen |
| Rosetta-2             | F- <i>ompT hsdSB(rB- mB-) gal dcm</i> pRARE2 (Cam <sup>R</sup> )                                                                    | Novagen    |
| Rosetta-2(DE3)        | F- <i>ompT hsdSB(rB- mB-) gal dcm</i> (DE3) pRARE2 (Cam <sup>R</sup> )                                                              | Novagen    |
| BTH101                | F- <i>cya-99 araD139 galE15 galK16 rpsL1</i> (Strr) <i>hsdR2 mcrA1 mcrB1</i>                                                        | Euromedex  |
| <b>Plasmids</b>       |                                                                                                                                     |            |
| pBJ113/114            | <i>galK</i> containing vector for generation of in-frame deletions in <i>M. xanthus</i> , Kan <sup>R</sup>                          | 10         |
| pSW105                | <i>PpilA</i> , Kan <sup>R</sup> , <i>attP</i>                                                                                       | 11         |
| pSWU30                | Tet <sup>R</sup> , <i>attP</i>                                                                                                      | 12         |
| pQE-30                | T5 promoter, lac operator, 6x-His-tag (N-term), Amp <sup>R</sup>                                                                    | Qiagen     |
| pET24b+               | T7 promoter, lac operator, 6x-His-tag (C-term), Kan <sup>R</sup>                                                                    | Novagen    |
| pMAT123               | pBJ114, in-frame deletion construct for MXAN_5772 ( $\Delta pilQ$ as in DK8615)                                                     | This study |
| pMAT150               | pBJ114, in-frame deletion construct for MXAN_5787 ( $\Delta pilT$ as in DK10409)                                                    | This study |
| pMAT162               | pBJ114, in-frame deletion construct for MXAN_5783 ( $\Delta pilA$ as in DK10410)                                                    | This study |
| pMAT163               | pBJ114, in-frame deletion construct for MXAN_5788 ( $\Delta pilB$ as in DK10416)                                                    | This study |
| pMAT164               | pBJ114, in-frame deletion construct for MXAN_0362                                                                                   | This study |

|         |                                                                                          |            |
|---------|------------------------------------------------------------------------------------------|------------|
| pMAT165 | pBJ114, in-frame deletion construct for MXAN_1020                                        | This study |
| pMAT166 | pBJ114, in-frame deletion construct for MXAN_1365                                        | This study |
| pMAT167 | pBJ114, in-frame deletion construct for MXAN_0364                                        | This study |
| pMAT175 | pBJ114, in-frame deletion construct for MXAN_1021                                        | This study |
| pMAT186 | pBJ114, in-frame deletion construct for MXAN_1366                                        | This study |
| pMAT168 | pBJ114, in-frame deletion construct for MXAN_0359-0364, cluster 1                        | This study |
| pMAT176 | pBJ114, in-frame deletion construct for MXAN_1017-1021, cluster 2                        | This study |
| pMAT187 | pBJ114, in-frame deletion construct for MXAN_1369-1365, cluster 3                        | This study |
| pMAT209 | pSW105 <i>PpilA</i> - <i>pilY1.3-FLAG</i>                                                | This study |
| pMAT212 | pSW105 <i>PpilA</i> - <i>pilY1.3</i>                                                     | This study |
| pMAT219 | pSW105 <i>PpilA</i> - <i>gfp-FLAG</i>                                                    | This study |
| pMAT223 | pSWU30 <i>PpilA</i> - <i>fimU3</i>                                                       | This study |
| pMAT224 | pSWU30 <i>PpilA</i> - <i>pilV3</i>                                                       | This study |
| pMAT225 | pSWU30 <i>PpilA</i> - <i>pilW3</i>                                                       | This study |
| pMAT229 | pSWU30 <i>PpilA</i> - <i>fimU3-pilV3-pilW3</i>                                           | This study |
| pMAT231 | pQE-30 His6- <i>pilA</i> ( $\Delta$ 1-41aa)                                              | This study |
| pMAT321 | pSW105 <i>PpilA</i> - <i>pilY1.3-sfGFP</i>                                               | This study |
| pMAT332 | pSW105 <i>PpilA</i> - <i>pilW3-sfGFP</i>                                                 | This study |
| pMAT336 | pBJ114, construct for endogenous <i>mCherry-pilM</i>                                     | This study |
| pMAT338 | pSWU30 <i>PpilA</i> - <i>pilX3</i>                                                       | This study |
| pMAT353 | pBJ114, in-frame deletion construct for MXAN_5786 ( $\Delta$ <i>pilC</i> as in DK10417)  | This study |
| pMAT393 | pSW105 <i>PpilA</i> - <i>pilY1.3 <math>\Delta</math>vWFA-FLAG</i>                        | This study |
| pMAT402 | pBJ114, in-frame deletion construct for MXAN_1366-1365 ( $\Delta$ <i>pilX3-pilY1.3</i> ) | This study |
| pMAT432 | pSW105 <i>PpilA</i> - <i>pilY1.3 <math>\Delta</math>vWFA -sfGFP</i>                      | This study |
| pAT2    | pBJ114, in-frame deletion construct for MXAN_1367                                        | This study |

|               |                                                                         |                       |
|---------------|-------------------------------------------------------------------------|-----------------------|
| pAT3          | pBJ114, in-frame deletion construct for MXAN_1368                       | This study            |
| pAT4          | pBJ114, in-frame deletion construct for MXAN_1369                       | This study            |
| pSM30         | pET24b+ -lonD-His6 (MXAN_3993)                                          | This study            |
| pIB21         | pBJ113, in-frame deletion construct for MXAN_5773 (PilP)                | 7                     |
| pKT25         | Two-hybrid plasmid, <i>cyaA</i> T25 C-terminal fusion, Kan <sup>R</sup> | Euromedex             |
| pUT18C        | Two-hybrid plasmid, <i>cyaA</i> T18 C-terminal fusion, Amp <sup>R</sup> | Euromedex             |
| pKNT25        | Two-hybrid plasmid, <i>cyaA</i> T25 N-terminal fusion, Kan <sup>R</sup> | Euromedex             |
| pUT18         | Two-hybrid plasmid, <i>cyaA</i> T18 N-terminal fusion, Amp <sup>R</sup> | Euromedex             |
| pKT25-zip     | Two-hybrid control plasmid                                              | D. Ladant (Euromedex) |
| pUT18C-zip    | Two-hybrid control plasmid                                              | D. Ladant (Euromedex) |
| p18C-PilA-SP  | pUT18C, <i>cyaT</i> 18-PilA-SP( $\Delta$ 1-12aa)                        | This study            |
| pKT-PilA-SP   | pKT25, <i>cyaT</i> 25-PilA-SP( $\Delta$ 1-12aa)                         | This study            |
| p18C-PilA-TM  | pUT18C, <i>cyaT</i> 18-PilA-TM( $\Delta\alpha$ 1N; $\Delta$ 1-41aa)     | This study            |
| pKT-PilA-TM   | pKT25, <i>cyaT</i> 25-PilA-TM( $\Delta\alpha$ 1N; $\Delta$ 1-41aa)      | This study            |
| p18C-FimU3-SP | pUT18C, <i>cyaT</i> 18-FimU3-SP( $\Delta$ 1-8aa)                        | This study            |
| pKT-FimU3-SP  | pKT25, <i>cyaT</i> 25-FimU3-SP( $\Delta$ 1-8aa)                         | This study            |
| p18C-PilV3-SP | pUT18C, <i>cyaT</i> 18-PilV3-SP( $\Delta$ 1-15aa)                       | This study            |
| pKT-PilV3-SP  | pKT25, <i>cyaT</i> 25-PilV3-SP( $\Delta$ 1-15aa)                        | This study            |
| p18C-PilW3-SP | pUT18C, <i>cyaT</i> 18-PilW3-SP( $\Delta$ 1-11aa)                       | This study            |
| pKT-PilW3-SP  | pKT25, <i>cyaT</i> 25-PilW3-SP( $\Delta$ 1-11aa)                        | This study            |
| p18C-PilX3-SP | pUT18C, <i>cyaT</i> 18-PilX3-SP( $\Delta$ 1-9aa)                        | This study            |
| pKT-PilX3-SP  | pKT25, <i>cyaT</i> 25-PilX3-SP( $\Delta$ 1-9aa)                         | This study            |
| p18C-AglQ     | pUT18C, <i>cyaT</i> 18-AglQ                                             | This study            |
| pKT-AglQ      | pKT25, <i>cyaT</i> 25-AglQ                                              | This study            |
| p18-AglR      | pUT18, <i>cya AglR-T18</i>                                              | This study            |
| pKNT-AglR     | pKNT25, <i>cya AglR-T25</i>                                             | This study            |

<sup>1</sup> Plasmids for ectopic expression of genes in *M. xanthus* are all derivatives of pSW105 and pSWU30 and were integrated by site specific recombination at the chromosomal *attB* site. Plasmids names are listed in parentheses. *PpilA* indicates that these genes were expressed from the *pilA* promoter. Coordinates for major and minor pilins corresponds to the full-length proteins, before cleavage by the PflD prepilin peptidase.

**Supplementary Table 2.** Oligonucleotides used in this work

| <b>Name</b>                       | <b>Sequence<sup>1</sup></b>              |
|-----------------------------------|------------------------------------------|
| mxan_0362-A BamHI                 | <b>GCGCGGATCC</b> CATCCGGCTGGGCAATCTGC   |
| mxan_0362-B overlay               | CCGGGCTGGGGGCGGCCAGTGTCTGGATGAG          |
| mxan_0362-C overlay               | CAGACACTGGCCGCCCCAGCCCGGACGGG            |
| mxan_0362-D HindIII               | <b>GCGCAAGCTT</b> TTCTCAACCGTGCAGAACGTCC |
| mxan_0362-E                       | CAAGGAGGCCTACTTCGCGG                     |
| mxan_0362-F                       | CGTTGGTGACTIONCAACATGG                   |
| mxan_0362-G                       | CCATGTCTGAAGCAGGACCC                     |
| mxan_0362-H                       | GTTGGCCAGCGCGGACGGTG                     |
| mxan_0364-A HindIII / cluster 1-A | <b>GCGCAAGCTT</b> GGTGAAGGACCTCATCGAG    |
| mxan_0364-B XbaI / cluster 1-B    | <b>GCGCTCTAGA</b> CCGCCGTCGGGTTGTGGG     |
| mxan_0364-C XbaI                  | <b>GCGCTCTAGA</b> GGAAATGAAGTGGACATC     |
| mxan_0364-D BamHI                 | <b>GCGCGGATCC</b> CATAGCCCCTGACGCGGAGG   |
| mxan_0364-E / cluster 1-E         | GAATGACTTCCTGTCTCCCG                     |
| mxan_0364-F                       | GTCGACAGCAACAACAACGG                     |
| mxan_0364-G                       | CATGGGCGTCGTCACGATGG                     |
| mxan_0364-H                       | GCCGGAGCCGTCGAAGGTGC                     |
| mxan_0359-C XbaI / cluster 1-C    | <b>GCGCTCTAGA</b> TGAGCACTGCCGGCACCTGAAG |
| mxan_0359-D BamHI / cluster 1-D   | <b>GCGCGGATCC</b> CGGAGGTGGAGCTGCTGC     |
| mxan0361-0359 F/ cluster 1-F      | CTTCGACCCGCGCAAGCACG                     |
| mxan_1020-A BamHI                 | <b>GCGCGGATCC</b> CGTCCCACCTTTGTCGCTGAC  |
| mxan_1020-B overlay               | GCGTGAGCCGGACGCGGCCATCCAGGTTCCG          |
| mxan_1020-C overlay               | TGGATGGCCGCGTCCGGCTCACGCGTCCAG           |
| mxan_1020-D HindIII               | <b>GCGCAAGCTT</b> GAAGGCGGGCGGCAGGCCTC   |
| mxan_1020-E                       | CTGTCACGGAGCATCCACCC                     |
| mxan_1020-F                       | CCACGCCTTCCGCAACGAGG                     |
| mxan_1020-G                       | CTGGGACAAATCCGATGTGG                     |
| mxan_1020-H                       | CACCCGGGCTCTCCATCACC                     |

|                                   |                                                 |
|-----------------------------------|-------------------------------------------------|
| mxan_1021-A Asel / cluster 2-A    | <b>GCGC<u>ATTAAT</u></b> GGAGCCAGTCGCCGGAAGCC   |
| mxan_1021-B Xbal / cluster 2-B    | <b>GCGCTCTAG<u>A</u></b> TGCGGGCTTGCGGGTCCGGATG |
| mxan_1021-C Xbal                  | <b>GCGCTCTAG<u>A</u></b> GGCACCTCCAGCAGCGGCC    |
| mxan_1021-D EcoRI                 | <b>GCGCG<u>AATTC</u></b> CCGATTCCGATTCGTGGCAC   |
| mxan_1021-E / cluster 2-E         | CTGTTCCACCCTGGCGCCC                             |
| mxan_1021-F                       | CATACAGGTACACGCTG                               |
| mxan_1021-G                       | GACCACGGAGAGCACGCTCC                            |
| mxan_1021-H                       | GCTCCAGGAGTGAGCGGACG                            |
| mxan_1017-C Xbal / cluster 2-C    | <b>GCGCTCTAG<u>A</u></b> TAGGCGGCGTCCGCACCG     |
| mxan_1017-D EcoRI / cluster 2-D   | <b>GCGCG<u>AATTC</u></b> GCCGGTGGCCTGCTGCTAGC   |
| Mxan1019-1017 F/ cluster 2-F      | GGGCCGCCAGGCAAGACTGC                            |
| mxan_1365-A BamHI                 | <b>GCGCGGATCC</b> CGCCGACTTCGACCCCATCG          |
| mxan_1365-B overlay               | GTTCTCGTGGCGGCTGTCAGGGTGGAGAA                   |
| mxan_1365-C overlay               | ACCCTGACAGCCCGCCACGAGAACGCGGCC                  |
| mxan_1365-D HindIII               | <b>GCGC<u>AAGCTT</u></b> CGGATGAGCATCTACGACGC   |
| mxan_1365-Enew / cluster 3-E      | CATGCTGGTGCATGAGAAGC                            |
| mxan_1365-Fnew / cluster 3-F      | CGGCAACCACGAGGTGATGG                            |
| mxan_1365-Gnew                    | CAGGCGGTGGCCACCTACAC                            |
| mxan_1365-Hnew                    | CCGGAGGCCCGTCATCAACG                            |
| mxan_1366-A HindIII               | <b>GCGC<u>AAGCTT</u></b> GGACTACTTCCTCGGGCGGC   |
| mxan_1366-B Xbal                  | <b>GCGCTCTAG<u>A</u></b> GCTGCCCGGCGTGAGGGC     |
| mxan_1366-C Xbal                  | <b>GCGCTCTAG<u>A</u></b> GAGACCGAGTTCGTCTTC     |
| mxan_1366-D BamHI                 | <b>GCGCGGATCC</b> GCGCACCACGTCCCTGGCCGC         |
| mxan_1366-Enew                    | GCCCTTCCAGTTGGAGCTGG                            |
| mxan_1366-Fnew                    | GTGATCTTCACGTTTCGCGC                            |
| mxan_1366-G                       | GCCCTGGCCATCACCCCTG                             |
| mxan_1366-H                       | GCCTCCGGGTTTCGTACA                              |
| mxan_1369-A HindIII / cluster 3-A | <b>GCGC<u>AAGCTT</u></b> GTTGTCCGTCAGCGCCACCG   |
| mxan_1369-B Xbal / cluster 3-B    | <b>GCGCTCTAG<u>A</u></b> CCGGCTCACTTGGCGACCTCC  |

|                                           |                                                          |
|-------------------------------------------|----------------------------------------------------------|
| mxan_1365-C Xbal / cluster 3-C            | <b>GCGCTCTAGAC</b> GCCACGAGAACGCGGCC                     |
| mxan_1365-D BamHI / cluster 3-D           | <b>GCGCGGATCCC</b> GGATGAGCATCTACGACGC                   |
| pilA( $\Delta$ 1-123)-BamHI-factor Xa fwd | <b>GCGCGGATCCC</b> GACATCGAGGGCCGCCGCTCGAAGCAGTCCG<br>AG |
| pilA stop HindIII                         | <b>GCGCAAGCTT</b> TTACTGGGCCGCGCCGTCGCAGGCGAC            |
| LonD-overex. fwd NdeI (MS-81)             | <b>ATCGCATATG</b> ATGTCCGATGAGAAGAAGAAG                  |
| LonD-overex. rev no stop HindIII (MS-82)  | <b>ATCGAAGCTT</b> GGCGCGGACCTCAGGGGCGG                   |
| pilT-A EcoRI                              | <b>GCGCGAATTC</b> CGCGACTTCGAGACGGCGG                    |
| pilT-D HindIII                            | <b>GCGCAAGCTT</b> GAGCTTCTCGTTCTTCTCC                    |
| 5787-G pilT                               | CTTGAAGACGGCGCCGCTGA                                     |
| 5787-H pilT                               | CGCGCTGATTCACGAGGCAG                                     |
| pilT-E                                    | CTCCGCCAGGACCCGGACATC                                    |
| pilT-F- (also used as pilB-F)             | CGAAGACGGGCGTCACCTTC                                     |
| mxan_1369-C Xbal                          | <b>GCGCTCTAGAG</b> TCAACCGATGAGGCGCCTG                   |
| mxan_1369-D BamHI                         | <b>GCGCGGATCCC</b> CCTGCGTGTAGTTGTCTTG                   |
| mxan_1368-A HindIII                       | <b>GCGCAAGCTT</b> AGCCGAATCAAATCATGGTC                   |
| mxan_1368-B Xbal                          | <b>GCGCTCTAGAG</b> GCGCCTCATCGTTGACCCT                   |
| mxan_1368-C Xbal                          | <b>GCGCTCTAGAG</b> TGGAGCTGTGAACGCCCCC                   |
| mxan_1368-D BamHI                         | <b>GCGCGGATCCC</b> GAACGTGGTCGTCGTAATTG                  |
| mxan_1367-A HindIII                       | <b>GCGCAAGCTT</b> CTGGCGTGGACCGGCATCTT                   |
| mxan_1367-B Xbal                          | <b>GCGCTCTAGAG</b> GGCGTTCACAGCTCCACCCC                  |
| mxan_1367-C Xbal                          | <b>GCGCTCTAGAG</b> TAGCCATCATGACCCACTTC                  |
| mxan_1367-D BamHI                         | <b>GCGCGGATCCC</b> CGCTGCCATCGAAGCGGTAG                  |
| mxan_1369 start Xbal                      | <b>GCGCTCTAGAG</b> TGAGCCGGCGCGACGCAC                    |
| mxan_1369 stop HindIII                    | <b>GCGCAAGCTT</b> TCATCGTTGACCCTCATG                     |
| mxan_1368 start Xbal                      | <b>GCGCTCTAGAG</b> ATGAGGCGCCTGAATCCC                    |
| mxan_1368 stop HindIII                    | <b>GCGCAAGCTT</b> TCACAGCTCCACCCCGC                      |
| mxan_1367 start Xbal                      | <b>GCGCTCTAGAG</b> TGAACGCCCCAGGACGC                     |
| mxan_1367 stop HindIII                    | <b>GCGCAAGCTT</b> CTAGCCTCCCAGACGTTTC                    |



|                                |                                                             |
|--------------------------------|-------------------------------------------------------------|
| mxan_1366 start Xbal           | <b>GCGCTCTAGA</b> ATGACCCACTTCGCCTCAC                       |
| mxan_1366 stop HindIII         | <b>GCGCAAGCTT</b> CTAGCCTCCCCAGACGTTC                       |
| mxan_1365 start Xbal           | <b>GCGCTCTAGA</b> ATGAAGGCACTCTTCTCCACC                     |
| mxan_1365 stop HindIII         | <b>GCGCAAGCTT</b> TCACGGCAGGCAACTGGCCG                      |
| pilM-prom fwd EcoRI            | <b>GCGCGAATTC</b> CCTGAAGTCCTACGCATG                        |
| pilM-mCherry overlay reverse   | <b>CATACTAGTAGATCT</b> GCGTGACTCCGTCGAGAG                   |
| mCherry+linker overlay forward | <b>AGATCTACTAGT</b> ATGGTGAGCAAGGGCGAGGAG                   |
| mCherry+linker-overlay reverse | <b>CAGTTTGCCCTTCGCT</b> CTAGAGGATCCCCGGGTAC                 |
| pilM-overlay forward           | GCGAAGGGCAAACCTGGTACTCGGC                                   |
| pilM int rev HindIII           | <b>GCGCAAGCTT</b> GATGTTACCACCGAGGC                         |
| pilM-E(pMAT336)                | GAGCCTTCATCGCTCGG                                           |
| pilM-F(pMAT336)                | CGGTGAACTGGTTGCCG                                           |
| B2H-pilA-SP fwd Xbal           | <b>GCGCTCTAGAG</b> TTACGCTCATCGAGCTCATGATCGTG               |
| B2H-pilA no stop BamHI         | <b>CGCGGATCCGG</b> CTGGGCCGCGCCGTGCGAGG                     |
| B2H-fimU3-SP fwd Xbal          | <b>GCGCTCTAGAG</b> ATGACGCTGCTGGAGGTC                       |
| B2H-fimU3 no stop BamHI        | <b>CGCGGATCCGG</b> TCGGTTGACCCTCATGTC                       |
| B2H-pilV3-SP fwd Xbal          | <b>GCGCTCTAGAG</b> GCCACGCTCATCGAAGGC                       |
| B2H-pilV3 no stop BamHI        | <b>CGCGGATCCGG</b> CAGCTCCACCCCCGCGCC                       |
| B2H-pilW3-SP fwd Xbal          | <b>GCGCTCTAGAG</b> TTACGCTCATCGAGTTG                        |
| B2H-pilW3 no stop BamHI        | <b>CGCGGATCCGG</b> GCCTCCCCAGACGTTCTT                       |
| B2H-pilX3-SP fwd Xbal          | <b>GCGCTCTAGAG</b> AGCGCCCTGGCCATCACC                       |
| B2H-pilX3 no stop BamHI        | <b>CGCGGATCCGG</b> GATGCCGAAGCGGAAGAC                       |
| B2H-pilA-TM fwd Xbal           | <b>GCGCTCTAGAG</b> CGCTCGAAGCAGTCCGAGG                      |
| mxan_1365 no stop BamHI        | <b>GCGCGGATCC</b> CGGCAGGCAACTGGCCGCGTTC                    |
| XI-S-B-(flag) stop HindIII fwd | CTAGAACTAGTGGATCC( <b>GACTACAAGGACGACGACGACAAG</b> )T<br>GA |
| XI-S-B-(flag) stop HindIII rev | AGCTTCA(CTTGTCGTCGTCGTCCTTGTAGTC)GGATCCACTAGT<br>T          |
| GFP-Xbal start(2nd codon)      | <b>GCGCTCTAGAG</b> GCCAAGGGCGAGGAGCTG                       |
| GFP-BamHI no stop              | <b>GCGCGGATCC</b> CTTGTACAGCTCGTCCATG                       |

|                        |                                                                        |
|------------------------|------------------------------------------------------------------------|
| pilQ-A-EcoRI           | <b><u>GCGCGAATTC</u></b> GTGCGCCGATGGTCGAAGACCC                        |
| pilQ-D-BamHI           | <b><u>GCGCGGATCC</u></b> GGTGCCTGCGGAAGGACATG                          |
| pilQ-E                 | CGACTTGGATCAGCTGAAGC                                                   |
| pilQ-F                 | CTGCACGCGAGGGCTCCTTC                                                   |
| pilQ-G                 | GCGCCCGCTCGTTGGTGCGC                                                   |
| pilQ-H                 | CACCTCCAACGACAGACGCG                                                   |
| linker-sfGFP-BamHI fwd | <b><u>GCGCGGATCC</u></b> CTGGAGGGCCCCGGCGGGCCTGATGAGCAAAG<br>GAGAAGAAC |
| sfGFP-HindIII reverse  | <b><u>GCGCAAGCTT</u></b> TTATTTGTAGAGCTCATCC                           |
| pilB-A EcoRI           | <b><u>GCGCGAATTC</u></b> CACCCTGCTGCCGCGCAAGC                          |
| pilB-D HindIII         | <b><u>GCGCAAGCTT</u></b> CTGGTTGAAGGTCTGCATGC                          |
| pilB-E2                | CAGGCAAGGTGCTCCAGCCG                                                   |
| pilC-A EcoRI           | <b><u>GCGCGAATTC</u></b> CGCTCACCATCGCGGAGACG                          |
| pilC-D HindIII         | <b><u>GCGCAAGCTT</u></b> GCCCAGGGCCAGGGAGTTGC                          |
| pilC-E                 | GTGACCTGGAGACGATTG                                                     |
| pilC-F                 | GGAGAGCTGACGTGAGAG                                                     |
| pilC-G                 | GCCTCGATATCCTCGCGAG                                                    |
| pilC-H                 | GATGAGGAAGCCACCGACC                                                    |
| pilA-A EcoRI           | <b><u>GCGCGAATTC</u></b> CACTGGCGCGACCACCGACC                          |
| pilA-D HindIII         | <b><u>GCGCAAGCTT</u></b> GAACTGAATGCCACCCGCCG                          |
| pilA-E                 | CGCTTCCGGCCGCGACACGG                                                   |
| pilA-F2                | CAGCAGTCCGTAGACCTGGC                                                   |
| pilA-G                 | CCTGGCCGCCATCGCCATCC                                                   |
| pilA-H                 | CGATCACCCAGTCATCGAAG                                                   |
| B2H-agIR-F HindIII     | <b><u>CCCAAGCTT</u></b> GACCTGGCGTCTGTGAC                              |
| B2H-agIR-R EcoRI       | <b><u>CCCGGAATTC</u></b> TCTCCTCCTCGTCGCGAGCCG                         |
| B2H-agIQ-F-XbaI        | <b><u>GCGCTCTAGAG</u></b> ATGGCCGGCGGAATGGAC                           |
| B2H-agIQ-R-BamHI       | <b><u>GCGCGGATCCTC</u></b> GCCCATCGCCGCGGACAC                          |
| delta vWFA+            | TCGCCGCGCGGCCACGTGCAGAACCGGAAATC                                       |

|                     |                                       |
|---------------------|---------------------------------------|
| delta vWFA-         | GTTCCGGTTCTGCACGTGGCCGC CGGCGAATA     |
| pilW3-no stop-BamHI | <b>GCGCGGATCC</b> GCCTCCCCAGACGTTCTTG |

<sup>1</sup> Primer sequences that are not complementary to the template are indicated in bold. Restriction sites are underlined.

## Supplementary References

- 1 Orans, J. *et al.* Crystal structure analysis reveals *Pseudomonas* PilY1 as an essential calcium-dependent regulator of bacterial surface motility. *Proc. Natl. Acad. Sci. USA* **107**, 1065-1070, doi:10.1073/pnas.0911616107 (2010).
- 2 Sun, M., Wartel, M., Cascales, E., Shaevitz, J. W. & Mignot, T. Motor-driven intracellular transport powers bacterial gliding motility. *Proc Natl Acad Sci U S A* **108**, 7559-7564, doi:10.1073/pnas.1101101108 (2011).
- 3 Chang, Y. W. *et al.* Architecture of the type IVa pilus machine. *Science* **351**, aad2001, doi:10.1126/science.aad2001 (2016).
- 4 Wang, F. *et al.* Cryoelectron microscopy reconstructions of the *Pseudomonas aeruginosa* and *Neisseria gonorrhoeae* type IV pili at sub-nanometer resolution. *Structure* **25**, 1423-1435 e1424, doi:10.1016/j.str.2017.07.016 (2017).
- 5 Kaiser, D. Social gliding is correlated with the presence of pili in *Myxococcus xanthus*. *Proc. Natl. Acad. Sci. USA* **76**, 5952-5956 (1979).
- 6 Wu, S. S., Wu, J. & Kaiser, D. The *Myxococcus xanthus pilT* locus is required for social gliding motility although pili are still produced. *Mol. Microbiol.* **23**, 109-121 (1997).
- 7 Friedrich, C., Bulyha, I. & Søgaard-Andersen, L. Outside-in assembly pathway of the type IV pilus system in *Myxococcus xanthus*. *J. Bacteriol.* **196**, 378-390, doi:10.1128/JB.01094-13 (2014).
- 8 Siewering, K. *et al.* Peptidoglycan-binding protein TsaP functions in surface assembly of type IV pili. *Proc. Natl. Acad. Sci. USA* **111**, E953-961, doi:10.1073/pnas.1322889111 (2014).
- 9 Bulyha, I. *et al.* Regulation of the type IV pili molecular machine by dynamic localization of two motor proteins. *Mol. Microbiol.* **74**, 691-706, doi:10.1111/j.1365-2958.2009.06891.x (2009).
- 10 Julien, B., Kaiser, A. D. & Garza, A. Spatial control of cell differentiation in *Myxococcus xanthus*. *Proc. Natl. Acad. Sci. USA* **97**, 9098-9103 (2000).
- 11 Jakovljevic, V., Leonardy, S., Hoppert, M. & Søgaard-Andersen, L. PilB and PilT are ATPases acting antagonistically in type IV pilus function in *Myxococcus xanthus*. *J. Bacteriol.* **190**, 2411-2421, doi:10.1128/JB.01793-07 (2008).
- 12 Wu, S. S. & Kaiser, D. Regulation of expression of the *pilA* gene in *Myxococcus xanthus*. *J. Bacteriol.* **179**, 7748-7758 (1997).
